# Supplementary material
Source: ML conference proceedings conference paper supplement (https://proceedings.neurips.cc/paper_files/paper/2007/hash/149e9677a5989fd342ae44213df68868-Abstract.html)

# An online Hebbian learning rule that performs Independent Component Analysis

Claudia Clopath, André Longtin, Wulfram Gerstner

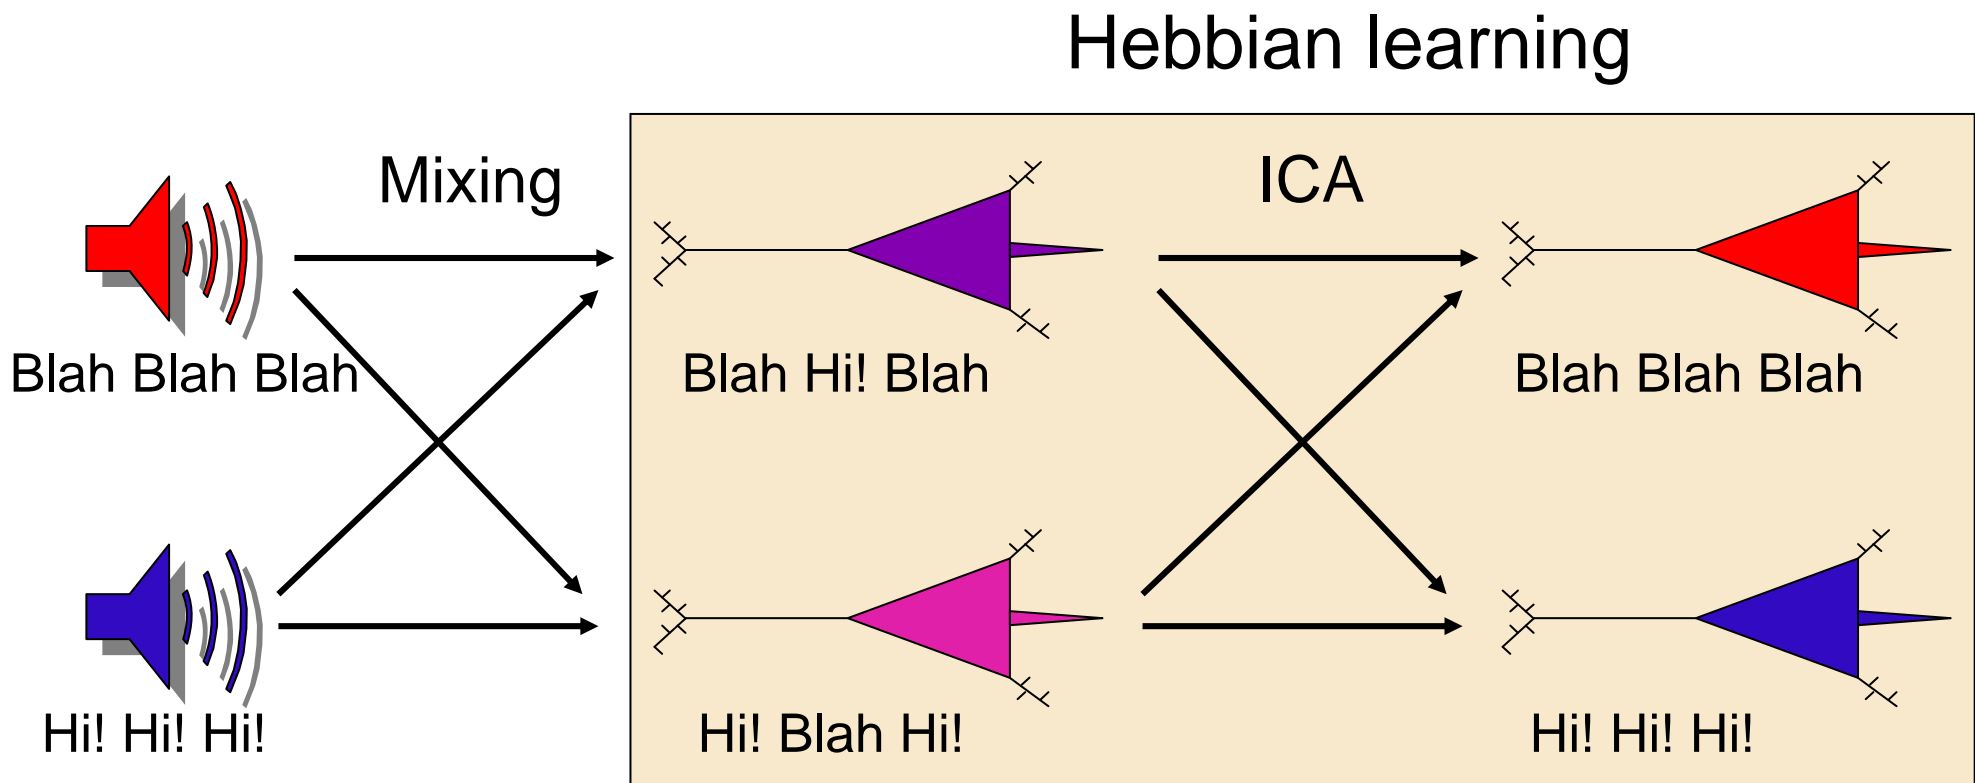

Supplement: Supplementary file [file 149e9677a5989fd342ae44213df68868-Supplemental.zip]
